# Supplementary material for: Enhanced Photoluminescence of Hydrogenated Amorphous Silicon Carbide Thin Films by Means of a Fast Thermal Annealing Process
Source: MDPI journal article supplement (doi:10.3390/ma13112643), 2020-06-10

# Enhanced Photoluminescence of Hydrogenated Amorphous Silicon Carbide Thin Films by Means of a Fast Thermal Annealing Process

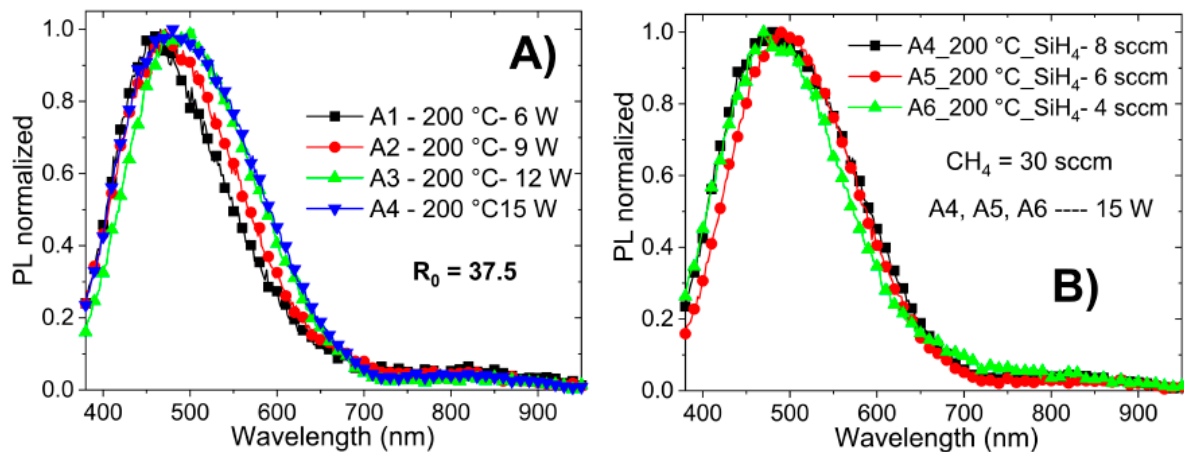

**Figure S1.** PL normalized of a-Si<sub>1-x</sub>C<sub>x</sub>H films annealed at 200 °C, **A)** Ratio R<sub>0</sub> = 37.5 with different RF power deposition from 6 to 15 W, **B)** Ratio R<sub>0</sub> from 37.5 to 75 with a fixed RF power at 15 W.

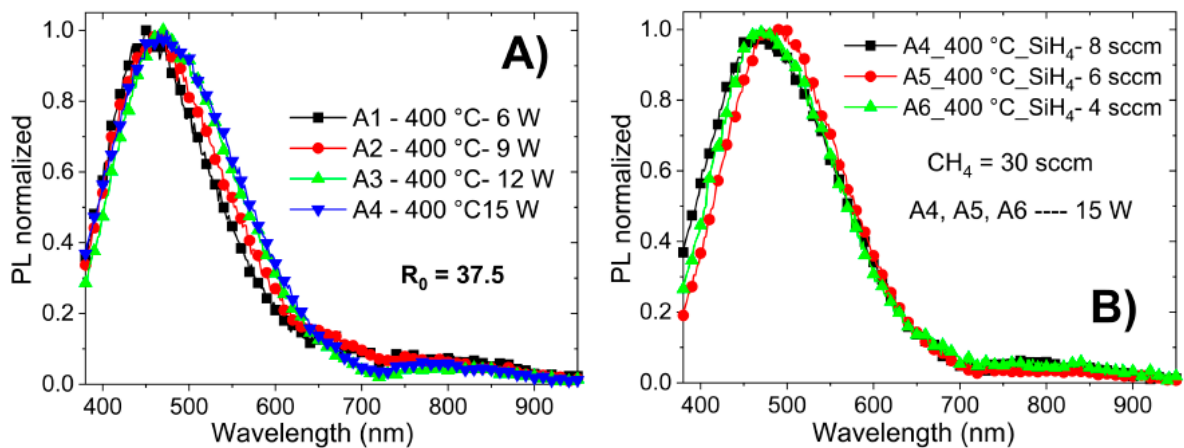

**Figure S2.** PL normalized of a-Si<sub>1-x</sub>C<sub>x</sub>H films annealed at 400 °C, **A)** Ratio R<sub>0</sub> = 37.5 with different RF power deposition from 6 to 15 W, **B)** Ratio R<sub>0</sub> from 37.5 to 75 with a fixed RF power at 15 W.

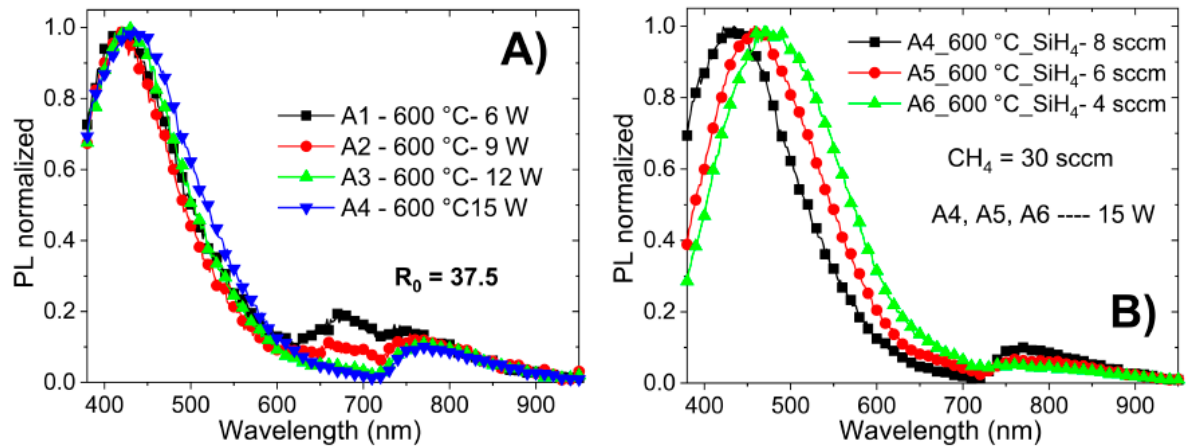

**Figure S3.** PL normalized of a-Si<sub>1-x</sub>C<sub>x</sub>:H films annealed at 600 °C, **A)** Ratio R<sub>0</sub> = 37.5 with different RF power deposition from 6 to 15 W, **B)** Ratio R<sub>0</sub> from 37.5 to 75 with a fixed RF power at 15 W.

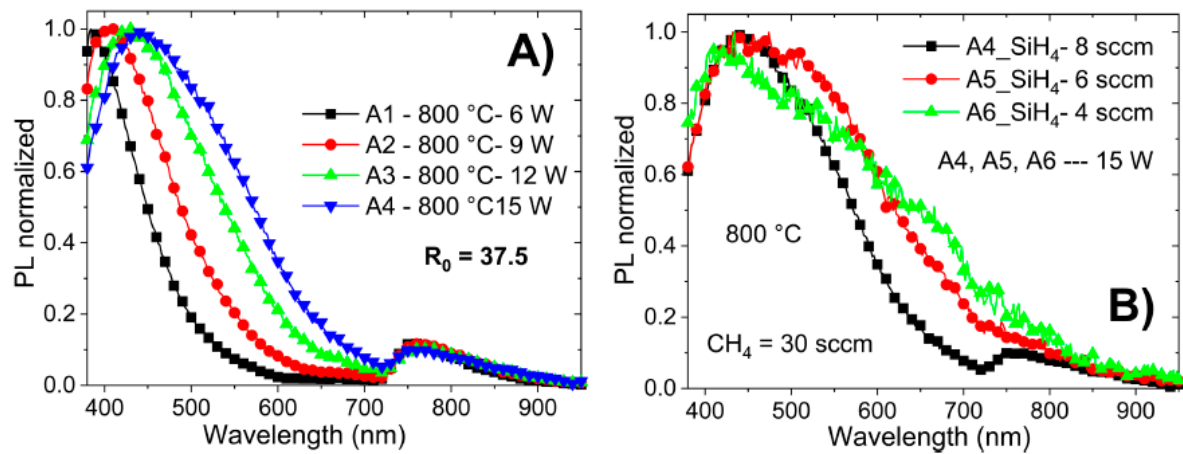

**Figure S4.** PL normalized of a-Si<sub>1-x</sub>C<sub>x</sub>:H films annealed at 800 °C, **A)** Ratio R<sub>0</sub> = 37.5 with different RF power deposition from 6 to 15 W, **B)** Ratio R<sub>0</sub> from 37.5 to 75 with a fixed RF power at 15 W.

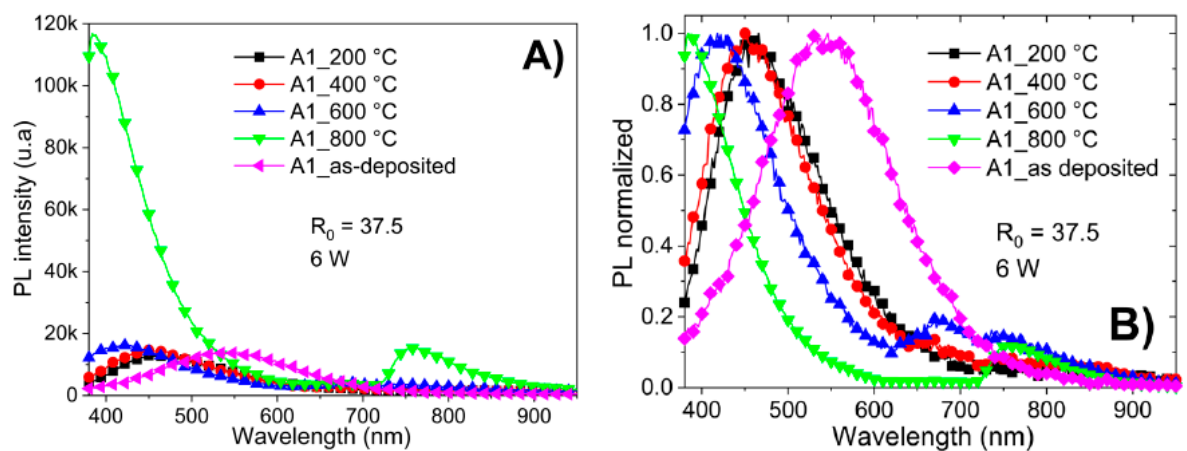

**Figure S5.** PL of a-Si<sub>1-x</sub>C<sub>x</sub>:H films deposited with R<sub>0</sub> = 37.5 ratio and 6 W of RF power, annealed at 200 °C, 400 °C, 600 °C, 800 °C, and as-deposited, **A)** without normalization, **B)** normalized.

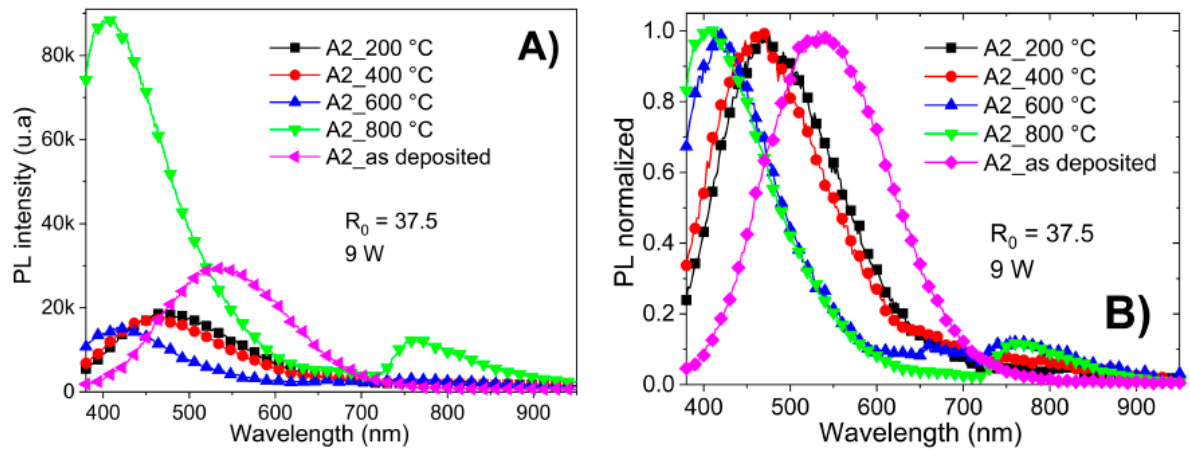

**Figure S6.** PL of  $a\text{-Si}_{1-x}\text{C}_x\text{H}$  films deposited with  $R_0 = 37.5$  ratio and 9 W of RF power, annealed at 200 °C, 400 °C, 600 °C, 800 °C, and as-deposited, **A)** without normalization, **B)** normalized.

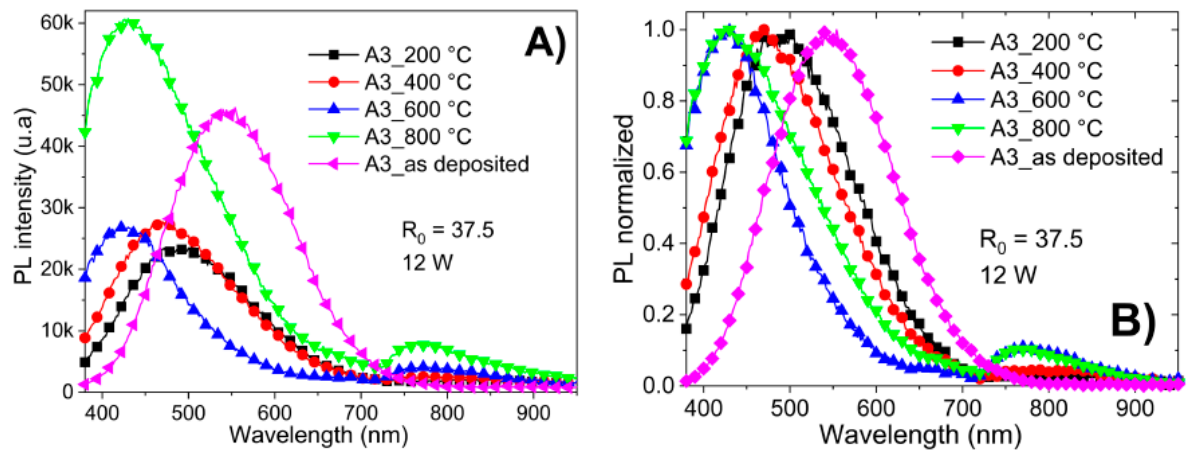

**Figure S7.** PL of  $a\text{-Si}_{1-x}\text{C}_x\text{H}$  films deposited with  $R_0 = 37.5$  ratio and 12 W of RF power, annealed at 200 °C, 400 °C, 600 °C, 800 °C, and as-deposited, **A)** without normalization, **B)** normalized.

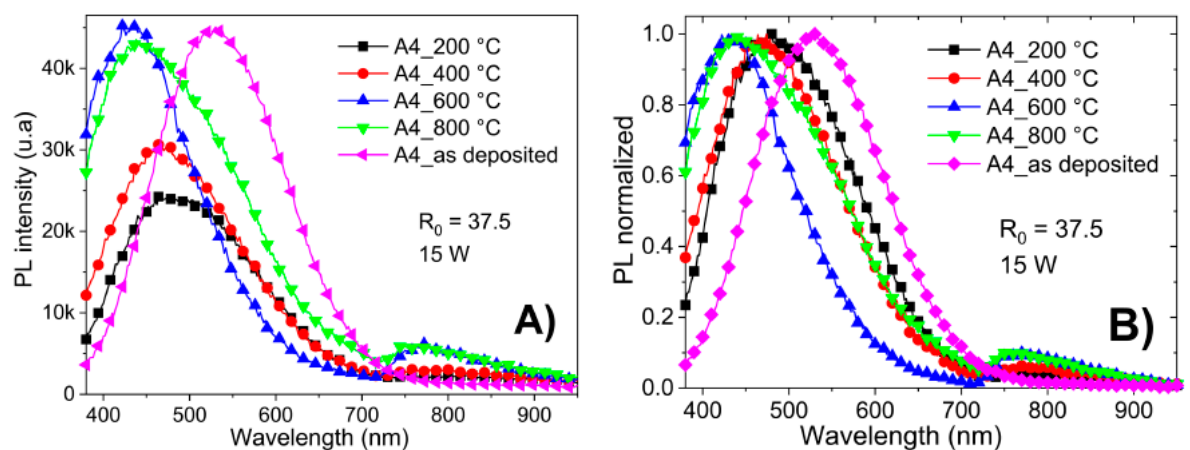

**Figure S8.** PL of  $a\text{-Si}_{1-x}\text{C}_x\text{H}$  films deposited with  $R_0 = 37.5$  ratio and 15 W of RF power, annealed at 200 °C, 400 °C, 600 °C, 800 °C, and as-deposited, **A)** without normalization, **B)** normalized.

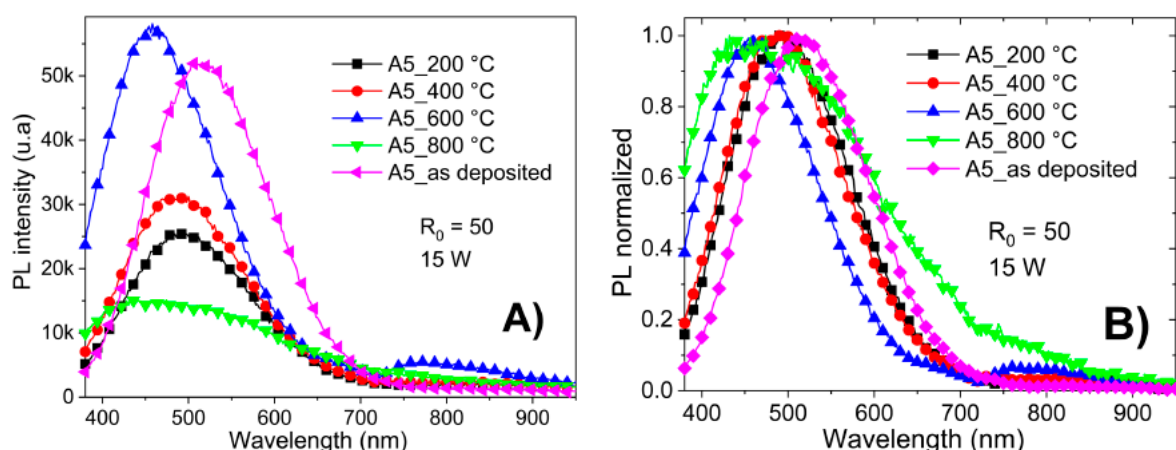

**Figure S9.** PL of a-Si<sub>1-x</sub>C<sub>x</sub>:H films deposited with  $R_0 = 50$  ratio and 15 W of RF power, annealed at 200 °C, 400 °C, 600 °C, 800 °C, and as-deposited, **A)** without normalization, **B)** normalized.

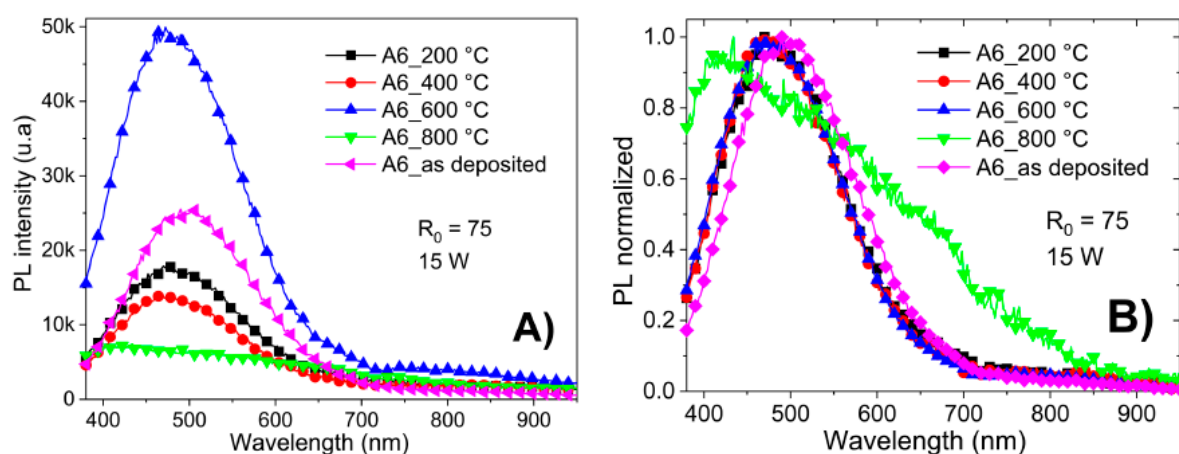

**Figure S10.** PL of a-Si<sub>1-x</sub>C<sub>x</sub>:H films deposited with  $R_0 = 75$  ratio and 15 W of RF power, annealed at 200 °C, 400 °C, 600 °C, 800 °C, and as-deposited, **A)** without normalization, **B)** normalized.

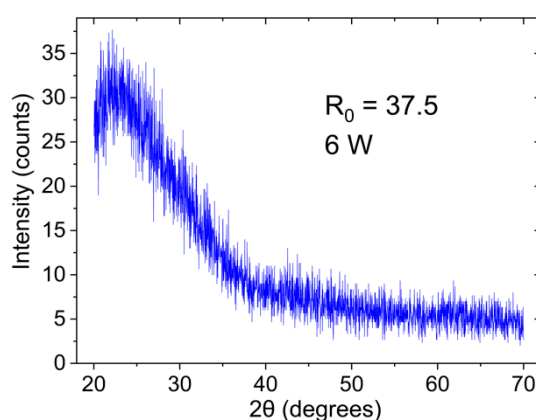

**Figure S11.** X-ray diffraction pattern of a-Si<sub>1-x</sub>C<sub>x</sub>:H sample deposited with  $R_0 = 37.5$  ratio and 6 W of RF power after a fast annealing process at 800 °C.

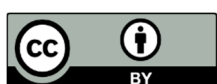

Supplement: s1 [file s1]
